# Supplementary material for: Multilocus coalescent analyses reveal the demographic history and speciation patterns of mouse lemur sister species
Source: PubMed Central journal article supplement (PMC3987692; doi:10.1186/1471-2148-14-57), 2014-03-24
Supplement: 1471-2148-14-57-S6.pdf [file 1471-2148-14-57-S6.pdf]

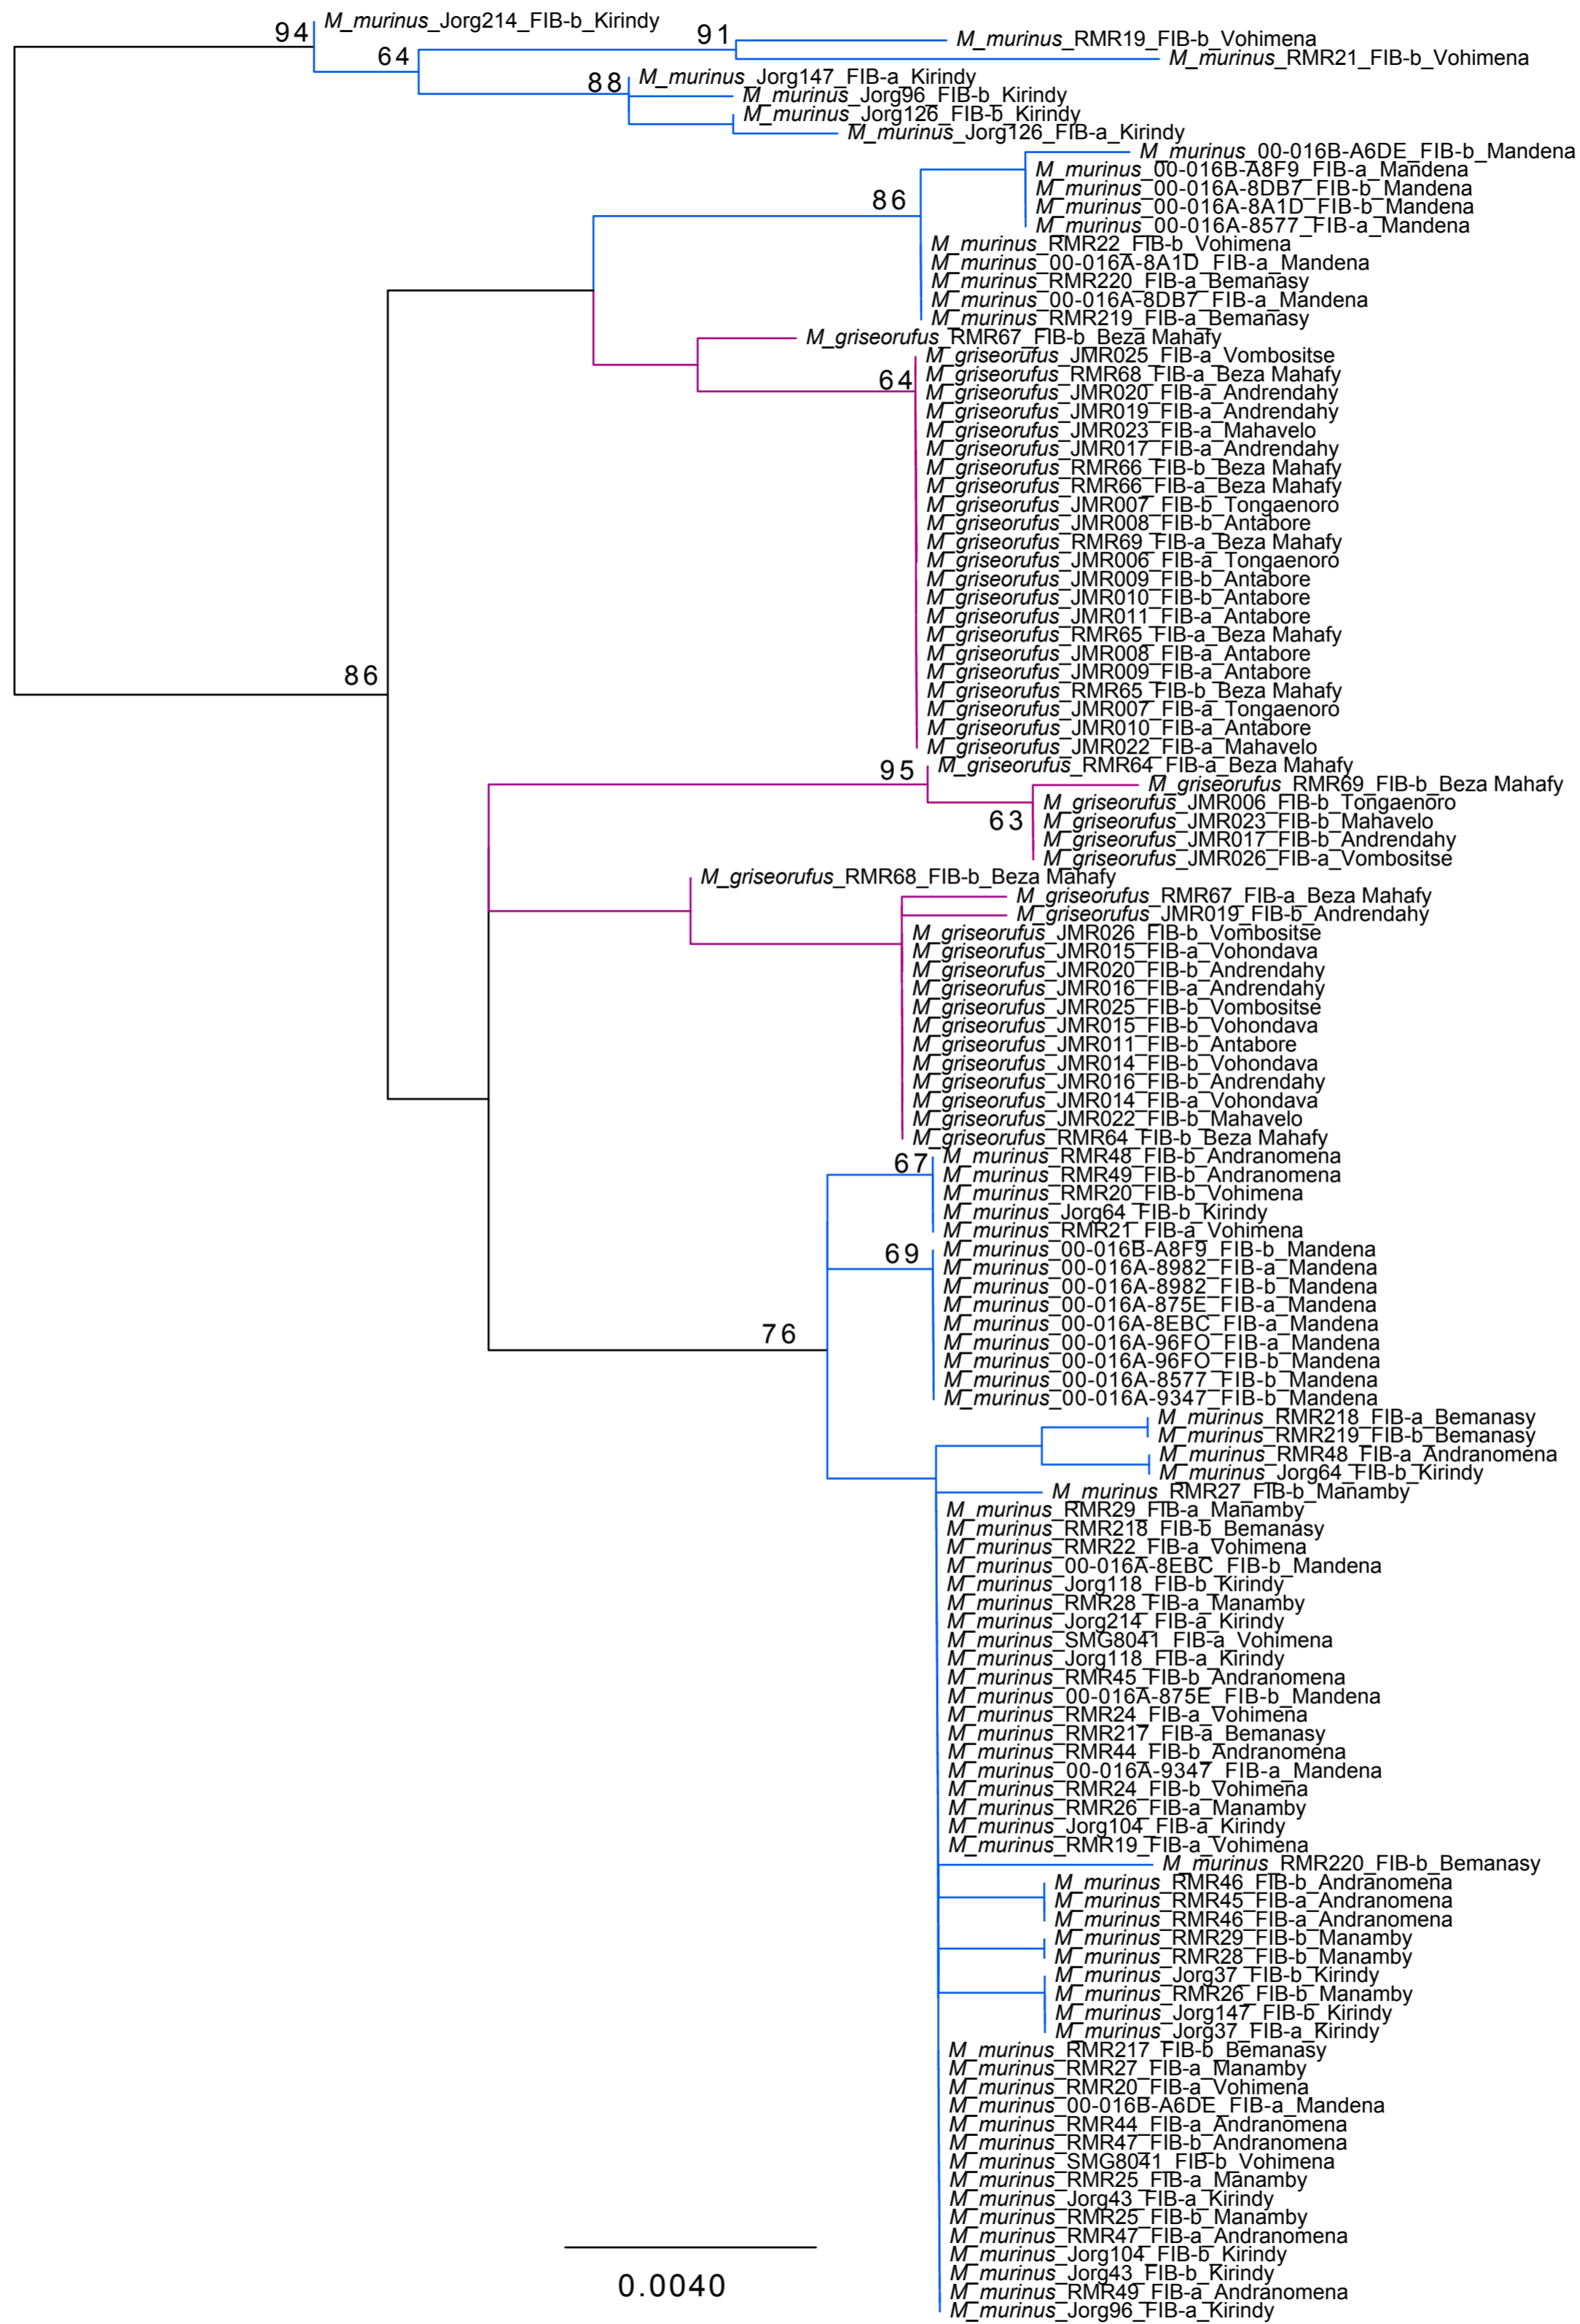

0.0040
